# Supplementary material
Source: PubMed Central journal article supplement (PMC2735797)
Supplement: neo1109_0864SD1.pdf [file neo1109_0864SD1.pdf]

**Table W1.** Demographics of the Patients Included in the Proteomic Study.

|                                    | Node-Negative ( <i>n</i> = 12) | Node-Positive ( <i>n</i> = 12) | <i>P</i> |
|------------------------------------|--------------------------------|--------------------------------|----------|
| Age (years)                        | 68.17 ± 11.71                  | 62.08 ± 12.30                  | .670     |
| Sex                                |                                |                                |          |
| Male                               | 8                              | 6                              | .680     |
| Female                             | 4                              | 6                              |          |
| Ethnicity*                         |                                |                                |          |
| White                              | 7                              | 6                              | .415     |
| African-American                   | 3                              | 6                              |          |
| Maximum diameter of the tumor (cm) | 4.75 ± 1.99                    | 5.32 ± 1.99                    | .464     |
| Histologic grade                   |                                |                                |          |
| Moderate                           | 11                             | 10                             | 1.000    |
| Poor                               | 1                              | 2                              |          |
| Primary site                       |                                |                                |          |
| Left colon                         | 7                              | 6                              | 1.000    |
| Right colon                        | 3                              | 4                              |          |
| Rectum                             | 2                              | 2                              |          |
| Primary tumor                      |                                |                                |          |
| T2                                 | 2                              | 1                              | 1.000    |
| T3                                 | 10                             | 10                             |          |
| T4                                 | 0                              | 1                              |          |

\*The ethnicity information of two patients from the node-negative group was missing.

**Table W2.** Proteins Identified by 2D-DIGE and MS.

| Accession No.                         | Protein Name                                                                                      | MASCOT Algorithm |        | SEQUEST Algorithm |          | Peptides | Sequence Coverage (%) | MW      | pI   | D Score | Fold Change | FDR (%) |
|---------------------------------------|---------------------------------------------------------------------------------------------------|------------------|--------|-------------------|----------|----------|-----------------------|---------|------|---------|-------------|---------|
|                                       |                                                                                                   | MASCOT Score     | CI (%) | P                 | Sf Score |          |                       |         |      |         |             |         |
|                                       |                                                                                                   |                  |        |                   |          |          |                       |         |      |         |             |         |
| Upregulated in node-positive cancer   |                                                                                                   |                  |        |                   |          |          |                       |         |      |         |             |         |
| Q01995                                | Transgelin                                                                                        | 96               | 100    |                   |          | 11       | 44                    | 22,653  | 8.87 | 2.85    | 2.06        | 0       |
| P40925                                | Cytosolic malate dehydrogenase                                                                    |                  |        | 2.584e-08         | 3.587517 | 4        | 18                    | 36,403  | 7.17 | 2.33    | 1.52        | 0       |
| Q01995                                | Transgelin                                                                                        | 127              | 100    |                   |          | 11       | 46                    | 22,653  | 8.87 | 2.14    | 1.89        | 7.18    |
| Q01995                                | Transgelin                                                                                        | 145              | 100    |                   |          | 15       | 61                    | 22,653  | 8.87 | 1.99    | 2.04        | 7.18    |
| Downregulated in node-positive cancer |                                                                                                   |                  |        |                   |          |          |                       |         |      |         |             |         |
| P30837                                | Aldehyde dehydrogenase X, mitochondrial precursor                                                 | 72               | 99.102 |                   |          | 14       | 29                    | 57,658  | 6.36 | -2.65   | -1.96       | 0       |
| P49748                                | Very long-chain specific acyl-CoA dehydrogenase, mitochondrial precursor                          | 108              | 100    |                   |          | 17       | 21                    | 70,745  | 8.92 | -2.13   | -1.75       | 0       |
| Upregulated in cancer                 |                                                                                                   |                  |        |                   |          |          |                       |         |      |         |             |         |
| P40121                                | Macrophage-capping protein                                                                        | 68               | 98.079 |                   |          | 5        | 13                    | 38,786  | 5.32 | 3.31    | 2.55        | 0       |
| Q9Y427                                | Tropomyosin 1 $\alpha$ chain isoform 2                                                            |                  |        | 3.982e-09         | 2.785449 | 3        | 13.03                 | 32,658  | 4.25 | 2.93    | 2.26        | 0       |
| P22626                                | Heterogeneous nuclear ribonucleoproteins A2/B1                                                    | 181              | 100    |                   |          | 11       | 49                    | 37,464  | 8.97 | 2.87    | 1.71        | 0       |
| Q8IUD2                                | ELKS/RAB6-interacting/CAST family member 1                                                        | 73               | 99.406 |                   |          | 33       | 21                    | 108,840 | 6.19 | 2.83    | 1.80        | 0       |
| Q9NZL3                                | Zinc finger protein 224                                                                           | 68               | 98.166 |                   |          | 25       | 27                    | 84,894  | 9.03 | 2.57    | 1.65        | 0       |
| P38919                                | Eukaryotic initiation factor 4A-III                                                               | 120              | 100    |                   |          | 16       | 36                    | 47,088  | 6.08 | 2.5     | 1.81        | 0       |
| Q15084                                | Protein disulfide-isomerase A6 precursor                                                          | 122              | 100    |                   |          | 14       | 32                    | 46,512  | 4.95 | 2.39    | 1.68        | 0       |
| P67936                                | Tropomyosin $\alpha$ -4 chain, isoform 2                                                          | 115              | 100    |                   |          | 12       | 34                    | 32,874  | 4.69 | 2.32    | 1.90        | 0       |
| P02792                                | Ferritin light chain                                                                              | 145              | 100    |                   |          | 6        | 44                    | 16,441  | 5.65 | 2.31    | 2.16        | 0       |
| P06702                                | Protein S100-A9                                                                                   | 74               | 99.433 |                   |          | 7        | 77                    | 13,291  | 5.71 | 2.24    | 2.17        | 0       |
| P14618                                | Pyruvate kinase isozymes M1/M2                                                                    | 146              | 100    |                   |          | 20       | 39                    | 58,470  | 7.96 | 2.22    | 1.62        | 0       |
| Q6ZWB8                                | cDNA FLJ14346 fis, clone BRAWH2005315, moderately similar to Neuronal-STOP protein (MAP6 protein) | 75               | 99.55  |                   |          | 20       | 32                    | 51,297  | 8.88 | 2.22    | 1.61        | 0       |
| Downregulated in cancer               |                                                                                                   |                  |        |                   |          |          |                       |         |      |         |             |         |
| P10809                                | 60 kDa heat shock protein, mitochondrial precursor (HSP60)                                        | 126              | 100    |                   |          | 17       | 27                    | 61,187  | 5.70 | 2.2     | 1.58        | 0       |
| P08670                                | Vimentin                                                                                          | 184              | 100    |                   |          | 28       | 55                    | 53,676  | 5.06 | 2.2     | 1.59        | 0       |
| P13796                                | Plastin-2                                                                                         | 113              | 100    |                   |          | 18       | 26                    | 70,815  | 5.20 | 2.14    | 1.50        | 0       |
| P14618                                | Pyruvate kinase isozymes M1/M2                                                                    | 174              | 100    |                   |          | 17       | 35                    | 58,512  | 7.96 | 1.96    | 1.73        | 0       |
| P29401                                | TKT protein                                                                                       | 66               | 96.813 |                   |          | 10       | 26                    | 50,335  | 8.02 | 1.96    | 1.80        | 0       |
| P37837                                | Transaldolase 1                                                                                   |                  |        | .0001081          | 1.946282 | 4        | 13.35                 | 37,516  | 6.00 | 1.94    | 1.47        | 0       |
| O00299                                | Chloride intracellular channel protein 1                                                          |                  |        | 1.284e-08         | 1.903239 | 2        | 14.29                 | 23,528  | 4.25 | 1.94    | 1.66        | 0       |
| Q15019                                | Septin-2                                                                                          |                  |        | 2.973e-09         | 5.429678 | 5        | 17.24                 | 46,556  | 6.00 | 1.89    | 1.52        | 0       |
| O00299                                | Chloride intracellular channel protein 1                                                          |                  |        | 4.272e-10         | 1.872898 | 2        | 14.29                 | 23,528  | 4.25 | 1.89    | 1.37        | 0       |
| Q7Z5Z4                                | SHUJUN-1                                                                                          | 105              | 100    |                   |          | 7        | 39                    | 17,047  | 4.21 | 1.88    | 1.37        | 0       |
| Q7KZF4                                | Staphylococcal nuclease domain-containing protein 1 (p100 coactivator)                            | 76               | 99.681 |                   |          | 26       | 29                    | 100,313 | 6.62 | 1.86    | 1.43        | 0       |
| O43707                                | $\alpha$ -Actinin-4                                                                               | 170              | 100    |                   |          | 28       | 33                    | 102,661 | 5.27 | 1.84    | 1.44        | 0       |

## Downregulated in cancer

|        |                                                                                                                                                               |             |           |    |       |        |       |       |       |   |
|--------|---------------------------------------------------------------------------------------------------------------------------------------------------------------|-------------|-----------|----|-------|--------|-------|-------|-------|---|
| P00915 | Carbonic anhydrase I                                                                                                                                          | 1.535e - 11 | 10,67389  | 9  | 56,30 | 28,852 | 7.13  | -6.54 | -4.90 | 0 |
| P56470 | Galectin 4                                                                                                                                                    | 7.614e - 10 | 3,753924  | 5  | 19,20 | 35,918 | 10,07 | -5.06 | -3.05 | 0 |
| P05787 | Keratin, type II cytoskeletal 8                                                                                                                               |             |           | 27 | 48    | 55,874 | 5.62  | -4.33 | -3.41 | 0 |
| P05787 | Keratin, type II cytoskeletal 8                                                                                                                               |             |           | 26 | 50    | 53,641 | 5.52  | -3.99 | -2.67 | 0 |
| Q14376 | UDP-galactose-4-epimerase                                                                                                                                     | 7.494e - 10 | 4,446128  | 4  | 18,39 | 38,257 | 6.00  | -3.84 | -2.36 | 0 |
| P35900 | Keratin, type I cytoskeletal 20                                                                                                                               |             |           | 19 | 41    | 48,514 | 5.52  | -3.68 | -2.28 | 0 |
| P17931 | LEG3_HUMAN Galectin-3 (Galactose-specific lectin 3) (Mac-2 antigen) (IgE-binding)                                                                             | 2.435e - 09 | 1,997028  | 6  | 28,40 | 26,172 | 9.88  | -3.65 | -2.18 | 0 |
| O95994 | Anterior gradient protein 2 homolog precursor                                                                                                                 |             |           | 7  | 42    | 20,024 | 9.03  | -3.43 | -2.78 | 0 |
| O95994 | Anterior gradient protein 2 homolog precursor                                                                                                                 |             |           | 7  | 42    | 20,024 | 9.03  | -3.36 | -2.76 | 0 |
| P05787 | Keratin, type II cytoskeletal 8                                                                                                                               |             |           | 25 | 46    | 55,787 | 5.62  | -3.12 | -2.50 | 0 |
| P17931 | Galectin-3                                                                                                                                                    |             |           | 5  | 46    | 15,630 | 9.41  | -3.08 | -1.95 | 0 |
| O75947 | ATP synthase, H <sup>+</sup> transporting, mitochondrial F0 complex, subunit d isoform                                                                        | 5.883e - 06 | 0,9162297 | 2  | 8,07  | 18,480 | 4.25  | -2.89 | -1.84 | 0 |
| P13645 | Keratin, type I cytoskeletal 10                                                                                                                               |             |           | 19 | 31    | 59,020 | 5.09  | -2.84 | -1.74 | 0 |
| P05787 | Keratin, type II cytoskeletal 8                                                                                                                               |             |           | 19 | 35    | 53,641 | 5.52  | -2.7  | -1.94 | 0 |
| P21796 | Voltage-dependent anion-selective channel protein 1                                                                                                           |             |           | 11 | 43    | 30,818 | 8.63  | -2.55 | -1.78 | 0 |
| P62826 | GTP-binding nuclear protein Ran                                                                                                                               |             |           | 4  | 21    | 23,307 | 9.02  | -2.33 | -1.65 | 0 |
| P47985 | Cytochrome <i>b-c1</i> complex subunit Rieske, mitochondrial precursor (ubiquinol-cytochrome <i>c</i> reductase iron-sulfur subunit, mitochondrial precursor) |             |           | 8  | 30    | 29,959 | 8.55  | -2.31 | -1.67 | 0 |
| Q99798 | Aconitate hydratase, mitochondrial precursor                                                                                                                  |             |           | 20 | 29    | 86,113 | 7.36  | -2.31 | -1.61 | 0 |
| Q8TF65 | PDZ domain protein GIPC2                                                                                                                                      | 1.683e - 10 | 1,945089  | 2  | 7,62  | 34,333 | 6.00  | -2.14 | -1.56 | 0 |
| P52597 | Heretogenous nuclear ribonucleoprotein F                                                                                                                      |             |           | 8  | 23    | 45,985 | 5.38  | -1.99 | -1.50 | 0 |
| P68871 | Hemoglobin subunit $\beta$                                                                                                                                    |             |           | 8  | 54    | 15,970 | 7.98  | -1.96 | -1.64 | 0 |
| P30041 | Peroxioredoxin-6                                                                                                                                              |             |           | 12 | 46    | 25,133 | 6.00  | -1.92 | -1.55 | 0 |
| P04075 | Fructose-bisphosphate aldolase A                                                                                                                              |             |           | 13 | 35    | 39,852 | 8.30  | -1.89 | -1.76 | 0 |
| P30048 | Thioredoxin-dependent peroxidase reductase, mitochondrial precursor                                                                                           |             |           | 6  | 26    | 26,107 | 7.04  | -1.84 | -1.55 | 0 |
| Q9UJ70 | <i>N</i> -Acetylglucosamine kinase                                                                                                                            |             |           | 11 | 35    | 37,694 | 5.81  | -1.84 | -1.51 | 0 |
| A4D0V4 | Capping protein (actin filament) muscle Z-line, $\alpha$ 2                                                                                                    | 1.175e - 06 | 1,73486   | 3  | 17,83 | 32,929 | 5.13  | -1.81 | -1.43 | 0 |
| O00151 | PDZ and LIM domain 1 (elfin)                                                                                                                                  | 5.059e - 09 | 1,168792  | 2  | 9,42  | 36,049 | 6.00  | -1.8  | -1.44 | 0 |
| P32119 | Peroxioredoxin-2                                                                                                                                              |             |           | 10 | 38    | 22,014 | 6.84  | -1.8  | -1.49 | 0 |
| P00491 | Purine nucleoside phosphorylase                                                                                                                               |             |           | 11 | 43    | 32,325 | 6.45  | -1.78 | -1.60 | 0 |
| Q9H2G3 | CTCL tumor antigen sc20-7 [fragment]                                                                                                                          |             |           | 25 | 24    | 73,884 | 5.57  | -1.77 | -1.59 | 0 |
| P00558 | Phosphoglycerate kinase 1                                                                                                                                     |             |           | 12 | 29    | 44,973 | 8.30  | -1.73 | -1.49 | 0 |
| P50213 | Isocitrate dehydrogenase [NAD] subunit $\alpha$ , mitochondrial precursor                                                                                     |             |           | 9  | 28    | 40,022 | 6.47  | -1.72 | -1.40 | 0 |

**Table W3.** Sequences Inserted in TAGLN miRNA Plasmids.

| DNA Oligos       | Top Strand (5'-3')                                                |
|------------------|-------------------------------------------------------------------|
| Hmi416872 top    | TGCTGATCTGAAGGCCAATGACATGCGTTTTGGCCACTGACTGACGCATGTCAGGCCTTCAGAT  |
| Hmi416872 bottom | CCTGATCTGAAGGCCTGACATGCGTCAGTCAGTGGCCAAAACGCATGTCATTGGCCTTCAGATC  |
| Hmi416873 top    | TGCTGAACCTGATGATCTGCCGAGGTCGTTTTGGCCACTGACTGACGACCTCGGGATCATCAGTT |
| Hmi416873 bottom | CCTGAACCTGATGATCCCAGGTCGTCAGTCAGTGGCCAAAACGCCTCGGCAGATCATCAGTTC   |
| Hmi416874 top    | TGCTGTGCACTTCGCGGCTCATGCCAGTTTTGGCCACTGACTGACTGGCATGACGCGAAGTGCA  |
| Hmi416874 bottom | CCTGTGCACTTCGCGTCATGCCAGTCAGTCAGTGGCCAAAACGGCATGAGCCGGAAGTGCA     |
| Hmi416875 top    | TGCTGTGTAATCCCTCTTATGCTCGTTTTGGCCACTGACTGACGAGCATAAGGGAATTCACA    |
| Hmi416875 bottom | CCTGTGTAATCCCTTATGCTCGTCAGTCAGTGGCCAAAACGAGCATAAGGGAATTCACAC      |

**Table W4.** Primers for Real-time RT-PCR.

| Gene          | Forward Primer (5'-3')    | Reverse Primer (5'-3')    |
|---------------|---------------------------|---------------------------|
| <i>TAGLN</i>  | GTCCAGACTGTTGACCTCTTT     | CTGCGCTTTCATCAAACC        |
| <i>TAGLN3</i> | ATGGGAAGGAAGGACATGGC      | GCTGGCTTTCCTGTGAAACC      |
| <i>ECAD</i>   | ATACACTCTCTTCTCAGCTGTG    | AAGAGCACCTTCCATGACAGAC    |
| <i>OCCL</i>   | CCTGATGAATCAAACCGAATC     | AGGAGAGGTCCATTTGTAGAAGTGA |
| <i>CTTNB1</i> | AAATGCTTGGTTCACCAGTGGAT   | CCTGCTTTTCTTCTTCTTCTT     |
| <i>VIM</i>    | TTCAGACAGGATGTGACAATGC    | GGATTCCTCTTCGTGGAGTTTC    |
| <i>FN1</i>    | CGAGAGTAAACCTGAAGCTGAAGAG | GATGCAGGTACAGTCCCAGATC    |
| <i>GAPDH</i>  | ACAGCCTCAAGATCATCAGCAAT   | ATGGACTGTGGTCATGAGTCCTT   |
